# Supplementary material for: A promising new nonlinear optical crystal with high laser damage threshold for application in the IR region: synthesis, crystal structure and properties of noncentrosymmetric CsHgBr3
Source: Royal Society of Chemistry journal article supplement (doi:10.1039/c4tc00565a), 2014-01-01
Supplement: c4tc00565a1.pdf [file c4tc00565a1.pdf]

Supporting Information for

**A Promising New Nonlinear Optical Crystal with high laser  
damage threshold for application in the IR Region:  
Synthesis, Crystal Structure and Properties of the  
Noncentrosymmetric CsHgBr<sub>3</sub>**

*Songwei Lv,<sup>†</sup> Qi Wu,<sup>†</sup> Xianggao Meng,<sup>‡</sup> Lei Kang,<sup>§</sup> Cheng Zhong,<sup>†</sup> Zheshuai Lin,<sup>§</sup>*

*Zhanggui Hu,<sup>§</sup> Xingguo Chen,<sup>†</sup> Jingui Qin<sup>\*†</sup>*

<sup>†</sup> Department of Chemistry, Wuhan University, Wuhan 430072, China,

<sup>‡</sup> College of Chemistry, Central China Normal University, Wuhan, 430079, China

<sup>§</sup> Beijing Center for Crystal R & D, Technical Institute of Physics and Chemistry,  
Chinese Academy of Sciences, Beijing 100190, China

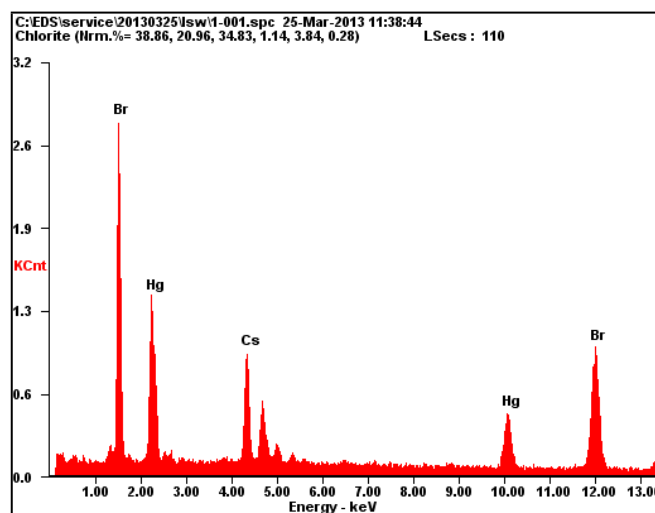

| <i>Element</i> | <i>Wt %</i> | <i>At %</i> |
|----------------|-------------|-------------|
| <i>CsL</i>     | 22.31       | 19.06       |
| <i>HgL</i>     | 34.43       | 19.49       |
| <i>BrK</i>     | 43.26       | 61.45       |

Figure S1. The Energy Dispersive X-Ray Spectroscopy of CsHgBr<sub>3</sub>

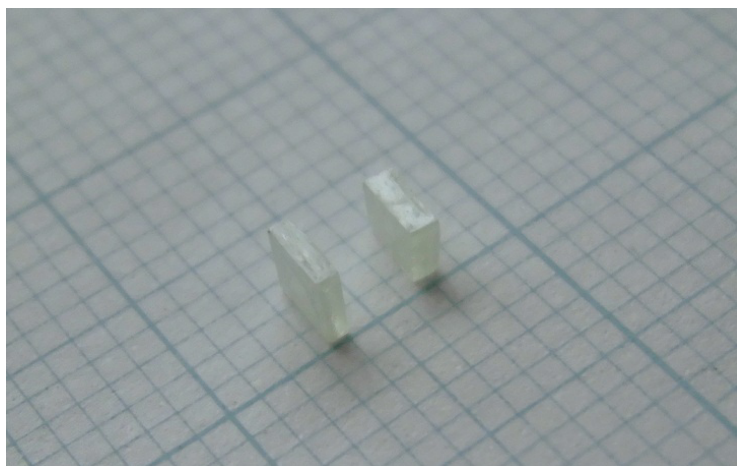

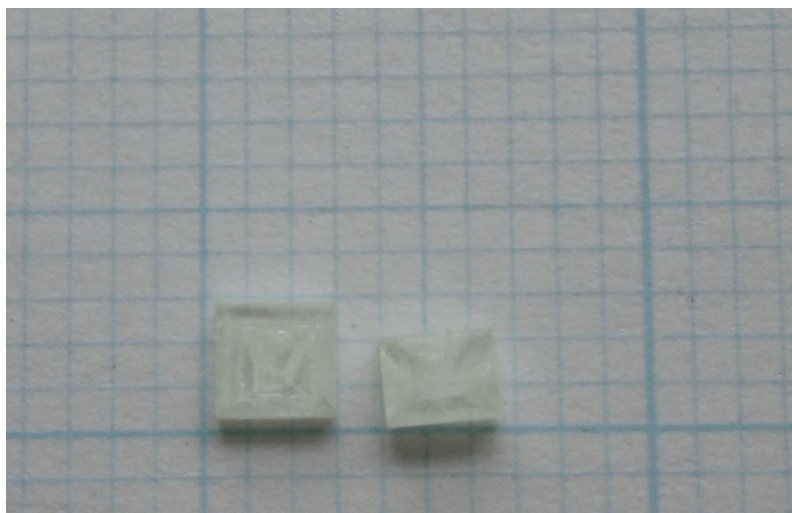

Figure S2. The photograph of CsHgBr<sub>3</sub> crystal

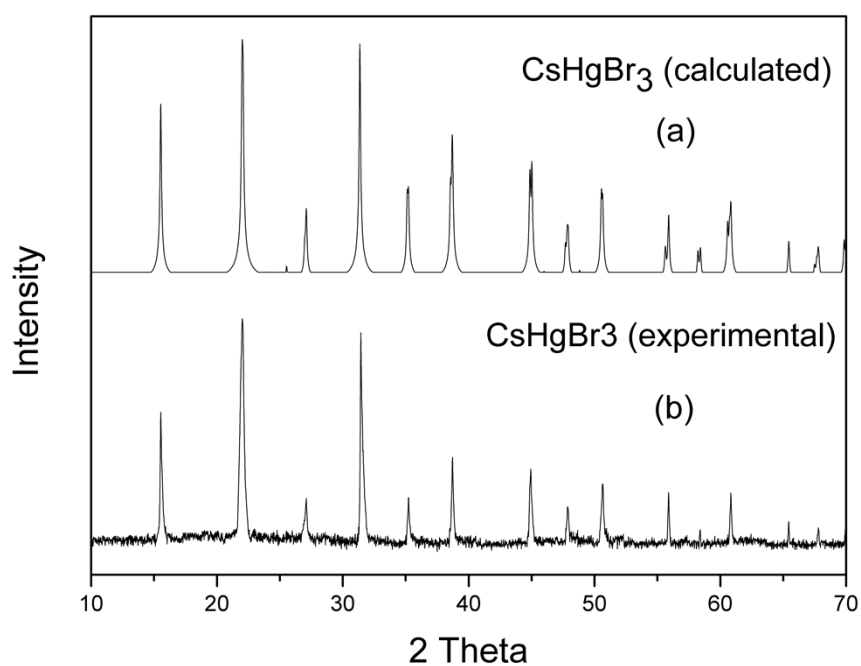

Figure S3. Comparison of experimental and calculated powder X-ray diffraction patterns (a) The calculated powder X-ray diffraction data of CsHgBr<sub>3</sub> from single crystal structure data (b) The experimental powder X-ray diffraction data of CsHgBr<sub>3</sub> of powders obtained from the solution reaction.
